# Supplementary material for: Intranasal oxytocin administration ameliorates social behavioral deficits in a POGZWT/Q1038R mouse model of autism spectrum disorder
Source: PubMed Central journal article supplement (PMC7962304; doi:10.1186/s13041-021-00769-8), 2021-03-16
Supplement: 13041_2021_769_MOESM1_ESM.pdf [file 13041_2021_769_MOESM1_ESM.pdf]

1 **Additional File 1**

2

3 **Detailed Materials and Methods**

4

5 **Drug administration**

6 Oxytocin (Peptide Institute Inc., Osaka, Japan) was dissolved in 1 mg/mL in saline (Otsuka  
7 Pharmaceutical Co., Ltd., Tokushima, Japan) before use. Oxytocin or saline was intranasally  
8 administered in mice at a volume of 0.2 mL/kg using a P20 micropipette (Gilson Inc., WI, USA)  
9 30 min before the reciprocal social interaction test. **Based on previous reports on mice (Smith et  
10 al., *Pharmacol. Res.*, 146:104324 (2019); Galbusera et al., *Neuropsychopharmacol.*, 42:1420-  
11 1434 (2017); Neumann et al., *Psychoneuroendocrinol.*, 38:1985-1993 (2013)), the estimated  
12 plasma oxytocin concentration in mice in the current study may be virtually similar to that in  
13 humans in clinical trials (Striepens et al., *Sci. Rep.*, 3:3440 (2013); Yamasue et al., *Mol. Psychiatry*,  
14 25:1849-1858 (2020)), however, further experiments are needed to determine the plasma oxytocin  
15 concentration in mice used in this study.**

16

17 **Reciprocal social interaction test**

18 Twelve-week-old male WT or *POGZ*<sup>WT/Q1038R</sup> mice (C57BL/6N genetic background) were used  
19 in the test. A test mouse was placed in a test cage and habituated for 60 min. Oxytocin or saline  
20 was administered 30 minutes after the beginning of habituation. After habituation, a 7-week-old  
21 male mouse (C57BL/N, Japan SLC, Shizuoka, Japan) was placed in the test cage as an intruder  
22 mouse. The duration of the sniffing behavior exhibited by the test mouse toward the intruder  
23 mouse was measured over the full experimental period (20 min). This test was conducted out  
24 between 10:00 and 14:00.

25

26 **Reverse transcription and real-time PCR**

27 Whole brains from 16-week-old mice were lysed with QIAzol Lysis Reagent (QIAGEN, Hilden,  
28 Germany) according to the manufacturer's instructions. Total RNA from brain lysates was  
29 isolated using the PureLink RNA Mini Kit (Thermo Fisher Scientific, MA, USA) according to the  
30 manufacturer's instructions. Total RNA was reverse transcribed using SuperScript III (Life  
31 Technologies, CA, USA). Real-time PCR was performed with TB Green Premix Ex Taq II

32 (Takara Bio Inc., Shiga, Japan) using a CFX96 real-time PCR detection system (Bio-Rad  
33 Laboratories, CA, USA). The expression levels of *OXTR* (forward primer sequence: 5'-  
34 GTGCAGATGTGGAGCGTCT-3'; reverse primer sequence: 5'-GTTGAGGCTGGCCAAGAG-  
35 3') and *AVPR1a* (forward primer sequence: 5'-CAATTTTCGTTTGGACCGATT-3'; reverse primer  
36 sequence: 5'-TGTTCAAGGAAGCCAGTAACG-3') were normalized to those of *GAPDH*  
37 (forward primer sequence: 5'-GTGTTCCCTACCCCAATGTG-3'; reverse primer sequence: 5'-  
38 TACCAGGAAATGAGCTTGAC-3') and determined according to the  $2^{-\Delta Ct}$  method. **The qRT-**  
39 **PCR products from all primer sets revealed a single band at the expected size.**

40

#### 41 **Immunoblotting**

42 Whole brains from 16-week-old mice were lysed using RIPA buffer. Brain lysates were resolved  
43 on 7.5% polyacrylamide–SDS gels by SDS–PAGE and transferred to PVDF membranes.  
44 Subsequently, the membranes were probed with rabbit anti-*OXTR* (Abcam, Cambridge, UK,  
45 #ab217212, 1:300) and mouse anti-*GAPDH* (Merck Millipore, MA, USA, #MAB374, 1:5000)  
46 antibodies overnight at 4°C, followed by incubation with the secondary antibodies, HRP-  
47 conjugated goat anti-mouse IgG (Santa Cruz Biotechnology, CA, USA, #sc-2005, 1:1000) and  
48 alkaline phosphatase-conjugated goat anti-rabbit IgG (Santa Cruz Biotechnology, #sc-2007,  
49 1:1000), for 1 h at room temperature. Proteins were visualized via alkaline phosphatase reaction  
50 using CDP-star (Roche Life Sciences, Basel, Switzerland) and HRP reaction using Western  
51 Lightning Plus ECL (PerkinElmer, MA, USA). Data acquisition and analysis were performed  
52 using the LAS4000 image analyzer (GE Healthcare, NJ, USA).

53

#### 54 **Immunohistochemistry**

55 Ten-week-old mice were deeply anesthetized via an intraperitoneal injection of a mixture of 3  
56 mg/kg medetomidine (Nippon Zenyaku Kogyo, Fukushima, Japan), 4 mg/kg midazolam (Sandoz  
57 Pharma, Basel, Switzerland), and 5 mg/kg butorphanol (Meiji Seika Pharma, Tokyo, Japan) and  
58 were transcardially perfused with saline, followed by 4% paraformaldehyde (PFA) dissolved in  
59 phosphate-buffered saline (PBS). The brains were excised and post-fixed in 4% PFA overnight at  
60 4 °C. The brains were sectioned at a thickness of 30 μm by using a cryostat (Leica, Wetzlar,  
61 Germany, CM1520). The brain slices were permeabilized with blocking solution containing 0.3%  
62 Triton X-100 (Wako, Osaka, Japan) and 5% bovine serum albumin (Sigma-Aldrich, MO, USA)

63 in PBS for 1 h and then incubated with the blocking solution combined with rabbit anti-oxytocin-  
64 neurophysin 1 (Abcam, #ab2078, 1:1000). The following day, the slices were incubated with the  
65 blocking solution combined with Alexa Fluor 488-conjugated goat anti-rabbit IgG (Life  
66 Technologies, CA, USA, #A-11008, 1:1000) and Hoechst 33258 dye (Calbiochem, CA, USA) for  
67 1 h. Seventeen to eighteen coronal sections per brain were imaged for quantification of OXT-  
68 expressing neurons in the PVN. Images of the stained brain slices were acquired using an  
69 Olympus FluoView FV1200 confocal microscope (Olympus, Tokyo, Japan) and a BZ-9000  
70 microscope (Keyence, Osaka, Japan). The images were then analyzed using ImageJ software  
71 (NIH, MD, USA).

72

### 73 **ChIP assay**

74 ChIP assay was performed as previously described [11]. In brief, chromatin was isolated from the  
75 cerebral cortex of WT mice. ChIP was performed with an anti-POGZ antibody (Bethyl  
76 Laboratories, TX, USA, A302-509A) and normal rabbit IgG (Merck Millipore, 12-370) using the  
77 ChIP-IT Express Enzymatic Magnetic ChIP Kit and Enzymatic Shearing Kit (Active Motif, CA,  
78 USA) according to the manufacturer's instructions. Following ChIP, the DNA samples were  
79 purified using the Chromatin IP DNA Purification Kit (Active Motif) and amplified via PCR using  
80 the GenoMatrix Whole Genome Amplification Kit (Active Motif). Quantitative PCR (qPCR) was  
81 performed using amplified DNA with the previously reported primers [14] for the mouse OXTR  
82 promoter region (forward primer for Region 1 sequence: 5'-TGGATTCTCCGCCAGATTG-3';  
83 reverse primer for Region 1 sequence: 5'-GAGTTTGCAAAGACGCCGAG-3'; forward primer  
84 for Region 2 sequence: 5'-AGATGGGAAGACCCCTCCT-3'; reverse primer for Region 2  
85 sequence: 5'-CGCAGCCAACCTGGAGTATCG-3'; forward primer for Region 3 sequence: 5'-  
86 CAGGGCTGGATGAAGACCG-3'; reverse primer for Region 3 sequence: 5'-  
87 AGGTGCACATTTTCTCGCTG-3'). A validated mouse negative control primer set (Active  
88 Motif, #71012) was used as a negative control. The enrichment of each amplicon by ChIP was  
89 normalized to the amount of amplified DNA fragments immunoprecipitated with the anti-POGZ  
90 antibody or normal rabbit IgG.

91

### 92 **Statistical analysis**

93 The behavioral data were statistically analyzed using two-way ANOVA, followed by Bonferroni-

94 Dunn post hoc tests. Quantitative reverse transcription PCR, western blotting and  
95 immunohistochemistry were statistically analyzed using Student's t-test. The significance level  
96 was set at  $P < 0.05$ . Statistical analyses were conducted using Stat-View software (SAS Institute,  
97 NC, USA).
