# Supplementary material for: Intranasal oxytocin administration ameliorates social behavioral deficits in a POGZWT/Q1038R mouse model of autism spectrum disorder
Source: PubMed Central journal article supplement (PMC7962304; doi:10.1186/s13041-021-00769-8), 2021-03-16
Supplement: 13041_2021_769_MOESM2_ESM.pdf [file 13041_2021_769_MOESM2_ESM.pdf]

## Additional File 2

### Additional Figure

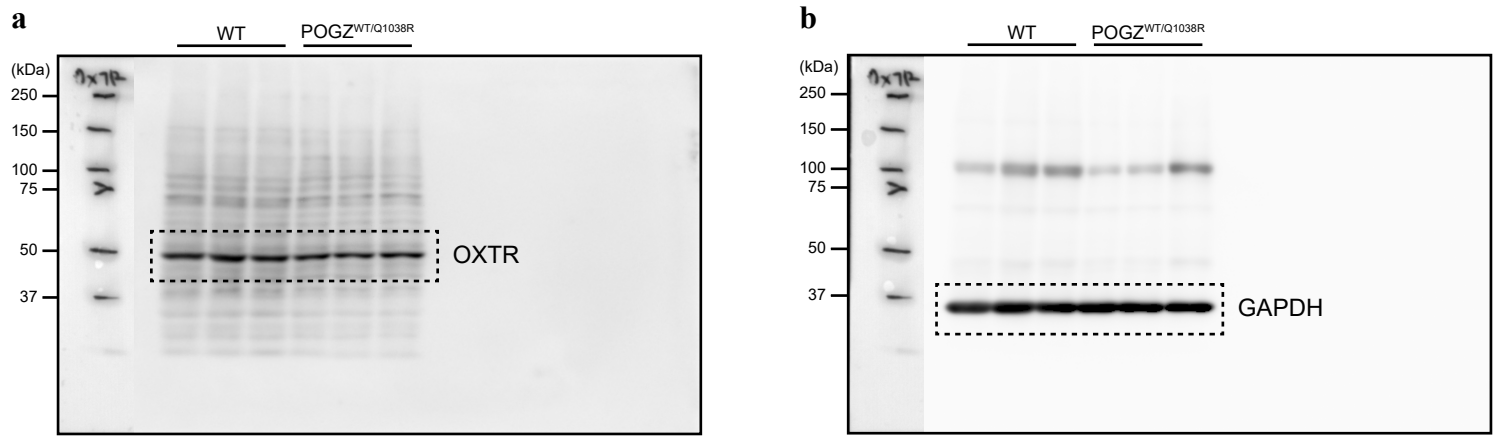

**Fig. S1** Raw images of entire membrane of immunoblotting.

**a** The raw image of immunoblotting of OXTR. **b** The raw image of immunoblotting of GAPDH.
